# Supplementary material for: Embodied time and the out-of-body experience of the self
Source: PeerJ. 2020 Mar 13;8:e8565. doi: 10.7717/peerj.8565 (PMC7075359; doi:10.7717/peerj.8565)
Supplement: Supplemental Information 1 [file peerj-08-8565-s001.xlsx]

## Sheet: Feuil1
Droit-Volet, Monceau, Dambrun, Marinelli (Submitted). Embodied time and out-of-body experience of the self. PeerJ
OrdreDes1Syn2	ID	Essai	Syn1Asyn2	Pleasure1NoPl2	FixRnd	EstiTemps	TimeSE	Out-Of-Feeling
1	1	1	2	1	6686	5400	-0.19	0
1	1	2	2	2	5100	3000	-0.41	2
1	1	3	2	1	4476	3000	-0.33	1
1	1	4	2	1	6866	5000	-0.27	1
1	1	5	2	2	7834	3000	-0.62	2
1	1
1	1	1	1	1	4712	3000	-0.36	2
1	1	2	1	2	4510	2000	-0.56	3
1	1	3	1	2	7608	6000	-0.21	2
1	1	4	1	1	6648	5000	-0.25	1
1	1	5	1	2	4205	3000	-0.29	2
1	1	6	1	1	6320	4000	-0.37	2
1	2	1	2	2	5437	15000	1.76	6
1	2	2	2	1	5474	6000	0.1	3
1	2	3	2	1	7929	25000	2.15	6
1	2	4	2	2	7812	15000	0.92	5
1	2	5	2	1	5016	10000	0.99	3
1	2	6	2	2	7880	30000	2.81	4
1	2	1	1	2	5138	10000	0.95	4
1	2	2	1	1	4093	7000	0.71	6
1	2	3	1	2	7803	20000	1.56	4
1	2	4	1	1	7436	20000	1.69	2
1	2	5	1	1	6843	25000	2.65	4
1	2	6	1	2	5590	15000	1.68	4
1	3	1	2	1	4239	5000	0.18	2
1	3	2	2	2	6872	8000	0.16	1
1	3	3	2	1	7145	10000	0.4	2
1	3	4	2	2	7298	10000	0.37	1
1	3	5	2	1	5492	10000	0.82	1
1	3	6	2	2	7530	5000	-0.34	3
1	3	1	1	2	5940	8000	0.35	6
1	3	2	1	1	6775	6000	-0.11	6
1	3	3	1	2	7472	10000	0.34	7
1	3	4	1	1	5037	3000	-0.4	7
1	3	5	1	2	5617	7000	0.25	7
1	3	6	1	1	7342	7000	-0.05	7
1	4	1	2	2	6002	15000	1.5	2
1	4	2	2	1	4065	10000	1.46	2
1	4	3	2	2	6846	20000	1.92	4
1	4	4	2	1	5699	12000	1.11	5
1	4	5	2	2	7550	30000	2.97	7
1	4	6	2	1	5116	15000	1.93	5
1	4	1	1	2	4273	20000	3.68	7
1	4	2	1	1	4154	15000	2.61	4
1	4	3	1	2	7342	25000	2.41	6
1	4	4	1	1	4497	15000	2.34	4
1	4	5	1	2	5526	25000	3.52	6
1	4	6	1	1	6936	30000	3.33	5
1	10	1	2	2	4854	3000	-0.38	1
1	10	2	2	1	4264	2000	-0.53	3
1	10	3	2	2	4503	6000	0.33	1
1	10	4	2	1	4706	1000	-0.79	1
1	10	5	2	1	5648	3000	-0.47	2
1	10	6	2	2	7701	5000	-0.35	1
1	10	1	1	2	4692	5000	0.07	2
1	10	2	1	1	6532	9000	0.38	3
1	10	3	1	2	4788	7000	0.46	1
1	10	4	1	1	4855	23000	3.74	3
1	11	1	2	2	7300	5000	-0.32	1
1	11	2	2	1	4613	3000	-0.35	1
1	11	3	2	2	7068	10000	0.41	1
1	11	4	2	1	5159	7000	0.36	1
1	11	5	2	1	6450	8000	0.24	1
1	11	6	2	2	5051	5000	-0.01	1
1	11	1	1	2	4224	4000	-0.05	1
1	11	2	1	1	7949	7000	-0.12	2
1	11	3	1	2	5072	5000	-0.01	1
1	11	4	1	1	6938	7000	0.01	1
1	11	5	1	1	6287	8000	0.27	1
1	11	6	1	2	7402	12000	0.62	1
1	12	1	2	1	6442	10000	0.55	4
1	12	2	2	2	4599	3000	-0.35	6
1	12	3	2	1	7744	7000	-0.1	3
1	12	4	2	2	6533	5000	-0.23	4
1	12	5	2	1	6760	7000	0.04	3
1	12	6	2	2	7384	6000	-0.19	5
1	12	1	1	1	4072	3000	-0.26	0
1	12	2	1	2	4283	3000	-0.3	7
1	12	3	1	1	6729	6000	-0.11	5
1	12	4	1	2	6547	3000	-0.54	7
1	12	5	1	1	7954	10000	0.26	5
1	12	6	1	2	4374	3000	-0.31	7
1	13	1	2	2	4262	5000	0.17	1
1	13	2	2	2	5909	4000	-0.32	2
1	13	3	2	1	6107	7000	0.15	2
1	13	4	2	2	6855	5000	-0.27	1
1	13	1	1	1	7126	10000	0.4	3
1	13	2	1	2	6530	8000	0.23	2
1	13	3	1	1	7491	11000	0.47	1
1	13	4	1	2	5369	8000	0.49	1
1	13	5	1	2	4885	3000	-0.39	2
1	13	6	1	1	5045	4000	-0.21	2
1	14	1	2	1	5653	8000	0.42	3
1	14	2	2	2	7252	12000	0.65	6
1	14	3	2	2	5449	5000	-0.08	8
1	14	4	2	1	5389	4000	-0.26	2
1	14	5	2	2	5601	6000	0.07	3
1	14	6	2	1	6936	7000	0.01	1
1	14	1	1	1	4969	3000	-0.4	2
1	14	2	1	2	4852	3000	-0.38	2
1	14	3	1	2	6426	6000	-0.07	5
1	14	4	1	1	4253	2000	-0.53	5
1	14	5	1	1	4122	5000	0.21	2
1	14	6	1	2	4081	3000	-0.26	2
1	20	1	2	2	5959	10000	0.68	5
1	20	2	2	1	5268	15000	1.85	7
1	20	3	2	1	5060	11000	1.17	5
1	20	4	2	2	4079	10000	1.45	5
1	20	5	2	2	4216	6000	0.42	6
1	20	6	2	1	5705	4000	-0.3	6
1	20	1	1	1	6472	11000	0.7	7
1	20	2	1	2	7588	9000	0.19	7
1	20	3	1	1	4879	10000	1.05	7
1	20	4	1	2	5445	12000	1.2	7
1	20	5	1	1	6075	15000	1.47	7
1	20	6	1	2	6352	10000	0.57	7
1	21	1	2	2	5737	5000	-0.13	2
1	21	2	2	1	6865	5000	-0.27	6
1	21	3	2	2	7182	3000	-0.58	5
1	21	4	2	1	6685	5000	-0.25	6
1	21	5	2	2	6896	7000	0.02	6
1	21	6	2	1	5684	5000	-0.12	8
1	21	1	1	2	6766	8000	0.18	8
1	21	2	1	1	7688	10000	0.3	8
1	21	3	1	2	5227	6000	0.15	8
1	21	4	1	1	5996	7000	0.17	8
1	21	5	1	2	5035	4000	-0.21	8
1	21	6	1	1	6747	7000	0.04	8
1	22	1	2	2	4524	4000	-0.12	3
1	22	2	2	1	4944	8000	0.62	2
1	22	3	2	1	6977	12000	0.72	5
1	22	4	2	2	6687	10000	0.5	3
1	22	5	2	1	5108	8000	0.57	5
1	22	6	2	2	7473	12000	0.61	4
1	22	1	1	2	6723	15000	1.23	5
1	22	2	1	1	7329	15000	1.05	4
1	22	3	1	2	4088	8000	0.96	3
1	22	4	1	1	6886	15000	1.18	4
1	22	5	1	2	6317	15000	1.37	4
1	22	6	1	1	4216	8000	0.9	5
1	23	1	2	1	4964	8000	0.61	5
1	23	2	2	2	6789	5000	-0.26	5
1	23	3	2	1	7841	10000	0.28	3
1	23	4	2	2	6991	7000	0	4
1	23	5	2	1	4435	5000	0.13	2
1	23	6	2	2	4016	5000	0.25	3
1	23	1	1	1	7960	15000	0.88	2
1	23	2	1	2	7661	10000	0.31	2
1	23	3	1	1	4167	5000	0.2	2
1	23	4	1	2	5671	5000	-0.12	2
1	23	5	1	1	4658	5000	0.07	3
1	23	6	1	2	6050	5000	-0.17	2
1	38	1	2	1	7639	5000	-0.35	2
1	38	2	2	2	6077	2000	-0.67	1
1	38	3	2	2	4674	5000	0.07	1
1	38	4	2	1	6511	5000	-0.23	1
1	38	5	2	1	5625	3000	-0.47	1
1	38	6	2	2	7853	5000	-0.36	1
1	38	1	1	2	5547	10000	0.8	1
1	38	2	1	1	5744	15000	1.61	1
1	38	3	1	2	6008	30000	3.99	1
1	38	4	1	1	7708	25000	2.24	1
1	38	5	1	2	5538	32000	4.78	1
1	38	6	1	1	6915	10000	0.45	1
1	39	1	2	2	5150	8000	0.55	4
1	39	2	2	1	7813	11000	0.41	7
1	39	3	2	1	6926	13000	0.88	2
1	39	4	2	2	7740	15000	0.94	6
1	39	5	2	1	7820	10000	0.28	1
1	39	6	2	2	4809	8000	0.66	3
1	39	1	1	2	7834	19000	1.43	8
1	39	2	1	1	7004	10000	0.43	7
1	39	3	1	2	6804	12000	0.76	5
1	39	4	1	1	4970	6000	0.21	6
1	39	5	1	1	4116	5000	0.21	2
1	39	6	1	2	4167	5000	0.2	2
1	41	1	2	1	7988	10000	0.25	2
1	41	2	2	2	4994	3000	-0.4	1
1	41	3	2	1	6171	5000	-0.19	2
1	41	4	2	2	4964	6000	0.21	2
1	41	5	2	1	4390	5000	0.14	2
1	41	6	2	2	5688	5000	-0.12	1
1	41	1	1	1	4105	5000	0.22	3
1	41	2	1	2	5311	6000	0.13	1
1	41	3	1	2	4863	6000	0.23	2
1	41	4	1	1	5960	7000	0.17	3
1	41	5	1	2	7233	8000	0.11	1
1	41	6	1	1	4596	5000	0.09	1
1	42	1	2	2	4987	20000	3.01	5
1	42	2	2	1	5308	10000	0.88	2
1	42	3	2	2	4053	7000	0.73	4
1	42	4	2	1	4230	10000	1.36	6
1	42	5	2	2	7288	30000	3.12	4
1	42	6	2	1	7258	25000	2.44	4
1	42	1	1	2	7653	30000	2.92	4
1	42	2	1	1	7087	15000	1.12	6
1	42	3	1	1	7290	15000	1.06	6
1	42	4	1	2	4799	10000	1.08	6
1	42	5	1	1	5600	25000	3.46	6
1	42	6	1	2	6707	32000	3.77	2
2	5	1	1	2	7567	12000	0.59	2
2	5	2	1	1	6754	20000	1.96	1
2	5	3	1	1	5536	18000	2.25	1
2	5	4	1	2	5543	5000	-0.1	3
2	5	5	1	1	5689	22000	2.87	1
2	5	6	1	2	5196	3000	-0.42	5
2	5	1	2	2	4201	8000	0.9	4
2	5	2	2	1	6975	12000	0.72	1
2	5	3	2	2	5850	16000	1.74	3
2	5	4	2	1	5480	7000	0.28	1
2	5	5	2	1	6437	19000	1.95	2
2	5	6	2	2	5345	10000	0.87	3
2	6	1	1	1	4838	5000	0.03	1
2	6	2	1	2	7541	5000	-0.34	1
2	6	3	1	1	6006	15000	1.5	2
2	6	4	1	2	5897	10000	0.7	2
2	6	5	1	1	5637	15000	1.66	2
2	6	6	1	2	4176	10000	1.39	1
2	6	1	2	1	4907	7000	0.43	1
2	6	2	2	2	5585	12000	1.15	1
2	6	3	2	1	4235	8000	0.89	3
2	6	4	2	2	6713	12000	0.79	2
2	6	5	2	2	4944	15000	2.03	2
2	6	6	2	1	5954	12000	1.02	1
2	7	1	1	2	4488	5000	0.11	4
2	7	2	1	1	4910	2000	-0.59	1
2	7	3	1	2	4089	5000	0.22	2
2	7	4	1	1	4554	3000	-0.34	1
2	7	1	2	1	5280	6000	0.14	1
2	7	2	2	2	6089	6000	-0.01	2
2	7	3	2	2	6029	10000	0.66	2
2	7	4	2	1	4548	5000	0.1	1
2	7	5	2	2	4225	5000	0.18	2
2	7	6	2	1	6321	8000	0.27	1
2	8	1	1	1	4704	2000	-0.57	7
2	8	2	1	2	4342	3000	-0.31	1
2	8	3	1	2	5338	7000	0.31	1
2	8	4	1	1	5085	5000	-0.02	3
2	8	5	1	1	4003	5000	0.25	3
2	8	6	1	2	7638	10000	0.31	1
2	8	1	2	2	4855	8000	0.65	1
2	8	2	2	1	4752	6000	0.26	3
2	8	3	2	2	6258	13000	1.08	1
2	8	4	2	1	4718	11000	1.33	2
2	8	5	2	2	6573	15000	1.28	3
2	8	6	2	1	7581	14000	0.85	4
2	9	1	1	2	5561	5000	-0.1	5
2	9	2	1	1	6511	2000	-0.69	7
2	9	3	1	2	6744	10000	0.48	7
2	9	4	1	1	4930	5000	0.01	8
2	9	5	1	2	5550	3000	-0.46	8
2	9	6	1	1	7983	13000	0.63	7
2	9	1	2	1	6675	7000	0.05	5
2	9	2	2	2	6981	5000	-0.28	5
2	9	3	2	1	7688	15000	0.95	7
2	9	4	2	2	6368	15000	1.36	9
2	9	5	2	2	7943	13000	0.64	4
2	9	6	2	1	6069	7000	0.15	7
2	15	1	1	1	7114	7000	-0.02	5
2	15	2	1	2	6813	8000	0.17	6
2	15	3	1	1	5356	9000	0.68	5
2	15	4	1	2	7367	12000	0.63	4
2	15	5	1	1	6467	8000	0.24	7
2	15	6	1	2	7908	13000	0.64	5
2	15	1	2	2	7359	14000	0.9	6
2	15	2	2	1	6531	12000	0.84	3
2	15	3	2	1	6500	13000	1	2
2	15	4	2	2	5379	8000	0.49	5
2	15	5	2	2	4546	10000	1.2	5
2	15	6	2	1	7853	15000	0.91	3
2	16	1	1	2	6863	10000	0.46	4
2	16	2	1	1	5403	5000	-0.07	1
2	16	3	1	1	5193	5000	-0.04	6
2	16	4	1	2	4280	3000	-0.3	2
2	16	5	1	1	5729	8000	0.4	3
2	16	6	1	2	6188	15000	1.42	2
2	16	1	2	1	4076	5000	0.23	4
2	16	2	2	2	6183	10000	0.62	3
2	16	3	2	2	7247	10000	0.38	1
2	16	4	2	1	6534	10000	0.53	4
2	16	5	2	2	6231	10000	0.6	2
2	16	6	2	1	7673	10000	0.3	3
2	17	1	1	1	4113	7000	0.7	8
2	17	2	1	2	7760	10000	0.29	1
2	17	3	1	2	6385	8000	0.25	9
2	17	4	1	1	4730	6000	0.27	2
2	17	5	1	1	6011	7000	0.16	1
2	17	6	1	2	4353	4000	-0.08	1
2	17	1	2	1	5655	7000	0.24	1
2	17	2	2	2	6715	7000	0.04	1
2	17	3	2	2	6499	7000	0.08	1
2	17	4	2	1	7446	8000	0.07	1
2	17	5	2	2	7243	9000	0.24	1
2	17	6	2	1	7369	9000	0.22	1
2	18	1	1	1	4364	19000	3.35	1
2	18	2	1	2	4361	15000	2.44	2
2	18	3	1	2	5417	14000	1.58	1
2	18	4	1	1	4782	20000	3.18	1
2	18	5	1	1	4039	9000	1.23	2
2	18	6	1	2	7221	30000	3.15	1
2	18	1	2	1	7817	23000	1.94	1
2	18	2	2	2	4582	9000	0.96	1
2	18	3	2	2	4371	10000	1.29	1
2	18	4	2	1	6480	22000	2.4	1
2	18	5	2	1	6264	15000	1.39	1
2	18	6	2	2	5388	18000	2.34	1
2	19	1	1	1	4066	5000	0.23	1
2	19	2	1	2	5548	6000	0.08	1
2	19	3	1	1	5460	2000	-0.63	1
2	19	4	1	2	4674	3000	-0.36	1
2	19	5	1	1	6473	5000	-0.23	1
2	19	6	1	2	5731	3000	-0.48	1
2	19	1	2	1	7956	6000	-0.25	5
2	19	2	2	2	4068	3000	-0.26	1
2	19	3	2	2	5988	5000	-0.16	1
2	19	4	2	1	6785	4000	-0.41	3
2	19	5	2	2	4982	3000	-0.4	1
2	19	6	2	1	6839	7000	0.02	1
2	25	1	1	1	5081	4300	-0.15	8
2	25	2	1	2	6361	3000	-0.53	5
2	25	3	1	2	6041	6000	-0.01	5
2	25	4	1	1	6521	6000	-0.08	4
2	25	5	1	2	4553	4000	-0.12	6
2	25	6	1	1	4970	3000	-0.4	6
2	25	1	2	1	7406	6000	-0.19	3
2	25	2	2	2	7319	3000	-0.59	5
2	25	3	2	1	7152	7000	-0.02	2
2	25	4	2	2	4886	6000	0.23	1
2	25	5	2	1	6853	5000	-0.27	2
2	25	6	2	2	7778	5000	-0.36	1
2	26	1	1	1	4586	25000	4.45	5
2	26	2	1	2	5797	15000	1.59	5
2	26	3	1	2	4202	10000	1.38	6
2	26	4	1	1	4152	12000	1.89	8
2	26	5	1	2	5253	15000	1.86	4
2	26	6	1	1	6392	20000	2.13	3
2	26	1	2	2	6437	20000	2.11	2
2	26	2	2	1	6857	25000	2.65	2
2	26	3	2	1	4382	10000	1.28	1
2	26	4	2	2	5257	15000	1.85	2
2	26	5	2	2	7035	12000	0.71	1
2	26	6	2	1	4476	8000	0.79	1
2	27	1	1	1	6303	5000	-0.21	1
2	27	2	1	2	7052	5000	-0.29	1
2	27	3	1	1	6839	8000	0.17	1
2	27	4	1	2	5314	6000	0.13	1
2	27	5	1	2	5877	6000	0.02	1
2	27	6	1	1	6832	6000	-0.12	1
2	27	1	2	1	4208	4000	-0.05	1
2	27	2	2	2	5907	6000	0.02	1
2	27	3	2	1	4866	5000	0.03	1
2	27	4	2	2	6000	5000	-0.17	1
2	27	5	2	2	5869	6000	0.02	1
2	27	6	2	1	7345	6000	-0.18	1
2	28	1	1	2	6446	4000	-0.38	1
2	28	2	1	1	6521	2000	-0.69	1
2	28	3	1	2	7468	4000	-0.46	1
2	28	4	1	1	7707	4000	-0.48	1
2	28	5	1	2	4333	6000	0.38	1
2	28	6	1	1	5375	3000	-0.44	1
2	28	1	2	2	5936	5000	-0.16	1
2	28	2	2	1	6028	4000	-0.34	1
2	28	3	2	1	5397	4000	-0.26	1
2	28	4	2	2	4383	2000	-0.54	1
2	28	5	2	2	6639	3000	-0.55	1
2	28	6	2	1	4759	3000	-0.37	1
2	29	1	1	1	7223	10000	0.38	1
2	29	2	1	2	5059	8000	0.58	1
2	29	3	1	2	4781	10000	1.09	2
2	29	4	1	1	6647	15000	1.26	1
2	29	5	1	1	7798	25000	2.21	4
2	29	6	1	2	6321	20000	2.16	5
2	29	1	2	1	4850	15000	2.09	3
2	29	2	2	2	4965	20000	3.03	2
2	29	3	2	1	6067	20000	2.3	3
2	29	4	2	2	7748	25000	2.23	2
2	29	5	2	2	5180	20000	2.86	1
2	30	6	2	1	7528	30000	2.99	4
2	30	1	1	2	7267	30000	3.13	9
2	30	2	1	1	6573	15000	1.28	4
2	30	3	1	2	4893	20000	3.09	6
2	30	4	1	1	4688	6000	0.28	3
2	30	5	1	2	4004	8000	1	5
2	30	6	1	1	5325	6000	0.13	3
2	30	1	2	1	5703	7000	0.23	2
2	30	2	2	2	4104	6000	0.46	3
2	30	3	2	2	6077	10000	0.65	5
2	30	4	2	1	7108	15000	1.11	2
2	30	5	2	2	4588	10000	1.18	3
2	30	6	2	1	5823	6000	0.03	2
2	31	1	1	1	4683	8000	0.71	9
2	31	2	1	2	6323	15000	1.37	9
2	31	3	1	1	4375	10000	1.29	2
2	31	4	1	2	4907	8000	0.63	1
2	31	5	1	2	4321	7000	0.62	1
2	31	6	1	1	4618	5000	0.08	1
2	31	1	2	1	6081	10000	0.64	1
2	31	2	2	2	6579	6000	-0.09	1
2	31	3	2	1	6193	10000	0.61	1
2	31	4	2	2	7282	12000	0.65	1
2	31	5	2	1	4349	5000	0.15	1
2	31	6	2	2	6556	10000	0.53	1
2	32	1	1	1	7600	5000	-0.34	7
2	32	2	1	2	5110	5000	-0.02	6
2	32	3	1	1	5682	8000	0.41	7
2	32	4	1	2	6158	10000	0.62	7
2	32	5	1	1	6779	11000	0.62	5
2	32	6	1	2	5821	6000	0.03	6
2	32	1	2	2	4842	7000	0.45	3
2	32	2	2	1	4200	4000	-0.05	3
2	32	3	2	1	4902	8000	0.63	3
2	32	4	2	2	4163	5000	0.2	4
2	32	5	2	1	7879	10000	0.27	4
2	32	6	2	2	5000	7000	0.4	4
2	33	1	1	1	7709	15000	0.95	1
2	33	2	1	2	6652	3000	-0.55	1
2	33	3	1	2	4683	8000	0.71	1
2	33	4	1	1	7760	15000	0.93	1
2	33	5	1	1	6633	10000	0.51	1
2	33	6	1	2	7106	15000	1.11	1
2	33	1	2	1	7822	15000	0.92	1
2	33	2	2	2	5272	10000	0.9	1
2	33	3	2	2	7197	15000	1.08	1
2	33	4	2	1	4354	5000	0.15	1
2	33	5	2	1	7107	10000	0.41	1
2	33	6	2	2	5140	8000	0.56	1
2	34	1	1	1	6806	3000	-0.56	1
2	34	2	1	2	7984	6000	-0.25	1
2	34	3	1	2	6978	8000	0.15	1
2	34	4	1	1	6451	3000	-0.53	1
2	34	5	1	2	7678	5000	-0.35	1
2	34	6	1	1	6765	3000	-0.56	1
2	34	1	2	2	4354	3000	-0.31	1
2	34	2	2	1	5895	4000	-0.32	1
2	34	3	2	2	7125	5000	-0.3	1
2	34	4	2	1	5783	4000	-0.31	0
2	34	5	2	2	6967	5000	-0.28	1
2	34	6	2	1	6602	3000	-0.55	1
2	35	1	1	2	4398	2000	-0.55	5
2	35	2	1	1	5834	4000	-0.31	3
2	35	3	1	2	7765	4000	-0.48	1
2	35	4	1	1	6966	5000	-0.28	5
2	35	5	1	1	4783	6000	0.25	1
2	35	6	1	2	5178	6000	0.16	3
2	35	1	2	2	6174	8000	0.3	2
2	35	2	2	1	6220	3000	-0.52	2
2	35	3	2	1	5584	5000	-0.1	2
2	35	4	2	2	4439	3000	-0.32	1
2	35	5	2	1	6222	3000	-0.52	2
2	35	6	2	2	4001	5000	0.25	2
2	36	1	1	2	5670	5000	-0.12	2
2	36	2	1	1	4587	6000	0.31	2
2	36	3	1	2	4560	5000	0.1	2
2	36	4	1	1	4258	6000	0.41	3
2	36	5	1	2	5125	7000	0.37	1
2	36	6	1	1	5540	6000	0.08	2
2	36	1	2	1	5282	8000	0.51	2
2	36	2	2	2	7110	9000	0.27	1
2	36	3	2	1	5586	7000	0.25	1
2	36	4	2	2	6892	10000	0.45	1
2	36	5	2	2	6674	10000	0.5	1
2	36	6	2	1	7917	9000	0.14	1
2	37	1	1	2	4155	7000	0.68	1
2	37	2	1	1	5353	5000	-0.07	1
2	37	3	1	1	6955	15000	1.16	2
2	37	4	1	2	4795	8000	0.67	2
2	37	5	1	1	7769	20000	1.57	2
2	37	6	1	2	6574	20000	2.04	2
2	37	1	2	2	6401	12000	0.87	1
2	37	2	2	1	4280	15000	2.5	1
2	37	3	2	1	7713	20000	1.59	1
2	37	4	2	2	7529	15000	0.99	1
2	37	5	2	2	5334	15000	1.81	1
2	37	6	2	1	6156	15000	1.44	1
2	40	1	1	2	6929	5000	-0.28	8
2	40	2	1	1	4222	2000	-0.53	1
2	40	3	1	2	5458	5000	-0.08	1
2	40	4	1	1	4045	2000	-0.51	1
2	40	5	1	2	4311	5000	0.16	1
2	40	6	1	1	5235	2000	-0.62	1
2	40	1	2	2	7943	3000	-0.62	1
2	40	2	2	1	4245	2000	-0.53	1
2	40	3	2	1	4397	3000	-0.32	1
2	40	4	2	2	6702	5000	-0.25	1
2	40	5	2	2	4764	5000	0.05	1
2	40	6	2	1	5503	3000	-0.45	1
1	43	1	2	1	6951	12000	0.73	3
1	43	2	2	1	4799	10000	1.08	5
1	43	3	2	1	7058	7000	-0.01	1
1	43	4	2	1	4684	8000	0.71	2
1	43	1	1	1	4828	12000	1.49	5
1	43	2	1	1	4356	9000	1.07	5
1	43	3	1	1	6718	8000	0.19	5
1	43	4	1	1	6283	7000	0.11	4
1	43	1	2	2	6224	5000	-0.2	2
1	43	2	2	2	5590	8000	0.43	2
1	43	3	2	2	4333	6000	0.38	2
1	43	4	2	2	6769	10000	0.48	3
1	43	5	2	2	4310	5000	0.16	3
1	43	1	2	2	4291	10000	1.33	5
1	43	2	2	2	4672	7000	0.5	4
1	43	3	2	2	4060	6000	0.48	3
1	43	4	2	2	5441	11000	1.02	7
1	44	1	2	1	6639	3000	-0.55	1
1	44	2	2	1	7249	8000	0.1	3
1	44	3	2	1	6681	7000	0.05	1
1	44	4	2	1	6844	8000	0.17	3
1	44	5	2	1	5201	5000	-0.04	1
1	44	1	1	1	5516	5000	-0.09	3
1	44	2	1	1	5311	5000	-0.06	1
1	44	3	1	1	6996	8000	0.14	3
1	44	4	1	1	5732	5000	-0.13	5
1	44	5	1	1	4343	4000	-0.08	3
1	44	1	2	2	4903	4000	-0.18	1
1	44	2	2	2	5582	5000	-0.1	1
1	44	3	2	2	7417	8000	0.08	2
1	44	4	2	2	5583	5000	-0.1	1
1	44	5	2	2	4576	6000	0.31	1
1	44	1	1	2	4500	6000	0.33	5
1	44	2	1	2	7098	5000	-0.3	3
1	44	3	1	2	4111	5000	0.22	4
1	44	4	1	2	6374	5000	-0.22	4
1	44	5	1	2	7737	9000	0.16	5
1	45	1	2	2	6986	12000	0.72	1
1	45	2	2	2	6143	12000	0.95	2
1	45	3	2	2	5150	20000	2.88	1
1	45	4	2	2	4479	5000	0.12	1
1	45	5	2	2	4206	10000	1.38	1
1	45	1	1	2	7502	10000	0.33	2
1	45	2	1	2	4746	15000	2.16	5
1	45	3	1	2	6503	20000	2.08	5
1	45	4	1	2	5074	10000	0.97	1
1	45	5	1	2	4141	5000	0.21	1
1	45	1	2	1	5021	10000	0.99	1
1	45	2	2	1	5283	10000	0.89	1
1	45	3	2	1	7709	10000	0.3	1
1	45	4	2	1	6451	10000	0.55	1
1	45	5	2	1	4159	7000	0.68	1
1	45	1	1	1	5798	7000	0.21	2
1	45	2	1	1	4165	10000	1.4	2
1	45	3	1	1	4482	15000	2.35	5
1	45	4	1	1	6121	20000	2.27	5
1	45	5	1	1	7025	10000	0.42	1
1	46	1	2	1	7989	9000	0.13	1
1	46	2	2	1	6741	6000	-0.11	1
1	46	3	2	1	5384	8000	0.49	5
1	46	4	2	1	6643	6000	-0.1	1
1	46	5	2	1	5730	5000	-0.13	3
1	46	1	1	1	5178	4000	-0.23	5
1	46	2	1	1	4705	8000	0.7	6
1	46	3	1	1	4612	7000	0.52	5
1	46	4	1	1	4156	5000	0.2	7
1	46	5	1	1	6156	8000	0.3	6
1	46	1	2	2	6471	8000	0.24	4
1	46	2	2	2	7686	9000	0.17	4
1	46	3	2	2	5043	8000	0.59	5
1	46	4	2	2	4136	8000	0.93	5
1	46	5	2	2	6264	8000	0.28	4
1	46	1	1	2	6934	10000	0.44	5
1	46	2	1	2	5984	5000	-0.16	6
1	46	3	1	2	4450	8000	0.8	6
1	46	4	1	2	4289	7000	0.63	6
1	46	5	1	2	6255	10000	0.6	7
2	47	1	2	2	5126	7000	0.37	4
2	47	2	2	2	5042	5000	-0.01	2
2	47	3	2	2	4914	5000	0.02	4
2	47	4	2	2	7478	7000	-0.06	2
2	47	5	2	2	4371	4000	-0.08	2
2	47	1	1	2	6181	5000	-0.19	2
2	47	2	1	2	4054	4000	-0.01	4
2	47	3	1	2	4278	5000	0.17	3
2	47	4	1	2	4618	6000	0.3	5
2	47	5	1	2	6102	7000	0.15	5
2	47	1	2	1	6495	9000	0.39	5
2	47	2	2	1	6734	8000	0.19	4
2	47	3	2	1	7134	6000	-0.16	2
2	47	4	2	1	6811	7000	0.03	2
2	47	5	2	1	5224	5000	-0.04	1
2	47	1	1	1	7993	10000	0.25	5
2	47	2	1	1	5243	6000	0.14	6
2	47	3	1	1	5984	9000	0.5	6
2	47	4	1	1	5236	8000	0.53	6
2	47	5	1	1	7108	9000	0.27	6
2	48	1	2	1	5550	10000	0.8	2
2	48	2	2	1	5658	7000	0.24	2
2	48	3	2	1	5557	10000	0.8	2
2	48	4	2	1	7041	10000	0.42	2
2	48	5	2	1	5980	10000	0.67	2
2	48	1	1	1	6217	9000	0.45	9
2	48	2	1	1	7878	15000	0.9	9
2	48	3	1	1	7820	15000	0.92	9
2	48	4	1	1	5700	9000	0.58	9
2	48	5	1	1	4058	8000	0.97	9
2	48	1	2	2	6414	10000	0.56	2
2	48	2	2	2	6320	10000	0.58	2
2	48	3	2	2	7310	16000	1.19	2
2	48	4	2	2	4808	9000	0.87	2
2	48	5	2	2	6174	11000	0.78	2
2	48	1	1	2	4165	7000	0.68	9
2	48	2	1	2	5834	10000	0.71	3
2	48	3	1	2	4282	9000	1.1	9
2	48	4	1	2	4262	10000	1.35	8
2	48	5	1	2	5008	10000	1	8
